# Supplementary material for: Expanding cross-presenting dendritic cells enhances oncolytic virotherapy and is critical for long-term anti-tumor immunity
Source: PubMed Central journal article supplement (PMC9684150; doi:10.1038/s41467-022-34791-8), 2022-11-22
Supplement: 41467_2022_34791_MOESM2_ESM.pdf [file 41467_2022_34791_MOESM2_ESM.pdf]

## Reporting Summary

Nature Portfolio wishes to improve the reproducibility of the work that we publish. This form provides structure for consistency and transparency in reporting. For further information on Nature Portfolio policies, see our [Editorial Policies](#) and the [Editorial Policy Checklist](#).

### Statistics

For all statistical analyses, confirm that the following items are present in the figure legend, table legend, main text, or Methods section.

- | n/a                                 | Confirmed                                                                                                                                                                                                                                                                                      |
|-------------------------------------|------------------------------------------------------------------------------------------------------------------------------------------------------------------------------------------------------------------------------------------------------------------------------------------------|
| <input type="checkbox"/>            | <input checked="" type="checkbox"/> The exact sample size ( $n$ ) for each experimental group/condition, given as a discrete number and unit of measurement                                                                                                                                    |
| <input type="checkbox"/>            | <input checked="" type="checkbox"/> A statement on whether measurements were taken from distinct samples or whether the same sample was measured repeatedly                                                                                                                                    |
| <input type="checkbox"/>            | <input checked="" type="checkbox"/> The statistical test(s) used AND whether they are one- or two-sided<br><i>Only common tests should be described solely by name; describe more complex techniques in the Methods section.</i>                                                               |
| <input checked="" type="checkbox"/> | <input type="checkbox"/> A description of all covariates tested                                                                                                                                                                                                                                |
| <input type="checkbox"/>            | <input checked="" type="checkbox"/> A description of any assumptions or corrections, such as tests of normality and adjustment for multiple comparisons                                                                                                                                        |
| <input type="checkbox"/>            | <input checked="" type="checkbox"/> A full description of the statistical parameters including central tendency (e.g. means) or other basic estimates (e.g. regression coefficient) AND variation (e.g. standard deviation) or associated estimates of uncertainty (e.g. confidence intervals) |
| <input type="checkbox"/>            | <input checked="" type="checkbox"/> For null hypothesis testing, the test statistic (e.g. $F$ , $t$ , $r$ ) with confidence intervals, effect sizes, degrees of freedom and $P$ value noted<br><i>Give <math>P</math> values as exact values whenever suitable.</i>                            |
| <input checked="" type="checkbox"/> | <input type="checkbox"/> For Bayesian analysis, information on the choice of priors and Markov chain Monte Carlo settings                                                                                                                                                                      |
| <input checked="" type="checkbox"/> | <input type="checkbox"/> For hierarchical and complex designs, identification of the appropriate level for tests and full reporting of outcomes                                                                                                                                                |
| <input checked="" type="checkbox"/> | <input type="checkbox"/> Estimates of effect sizes (e.g. Cohen's $d$ , Pearson's $r$ ), indicating how they were calculated                                                                                                                                                                    |

*Our web collection on [statistics for biologists](#) contains articles on many of the points above.*

### Software and code

Policy information about [availability of computer code](#)

Data collection

- FACS Diva 6 (BD) and Attune NxT Software (ThermoFisher) for conventional flow cytometry
- SpectroFlo Software (Cytek) for spectral flow cytometry
- ZEN Black (version 2.3) for microscopy
- HiSeq 4000 (Illumina), for sequencing
- Living Image software (PerkinElmer)

Data analysis

- Cytobank for flow cytometry
- FIJI for microscopy
- HTSeqGenie in BioConductor, for DNaseq and RNAseq
- Morpheus, <https://software.broadinstitute.org/morpheus>, for qPCR data
- GraphPad Prism 9.0

For manuscripts utilizing custom algorithms or software that are central to the research but not yet described in published literature, software must be made available to editors and reviewers. We strongly encourage code deposition in a community repository (e.g. GitHub). See the Nature Portfolio [guidelines for submitting code & software](#) for further information.

## Data

Policy information about [availability of data](#)

All manuscripts must include a [data availability statement](#). This statement should provide the following information, where applicable:

- Accession codes, unique identifiers, or web links for publicly available datasets
- A description of any restrictions on data availability
- For clinical datasets or third party data, please ensure that the statement adheres to our [policy](#)

### Data Availability:

The datasets supporting the findings presented in this study are available from the corresponding author upon reasonable request. All requests for data and materials will be promptly reviewed by the Icahn School of Medicine at Mount Sinai to verify whether the request is subject to any intellectual property or confidentiality obligations. Patient-related data were generated as part of a clinical trial and may be subject to patient confidentiality. Any data that can be shared will be released via a Material Transfer Agreement.

## Human research participants

Policy information about [studies involving human research participants and Sex and Gender in Research](#).

### Reporting on sex and gender

Samples from both men and women were used, however, sex and gender analyses were not performed since it was not of relevance for the current study; patient samples were primarily used to validate mechanistic results obtained from mouse data.

### Population characteristics

Our research did not involve human research participants, but used samples from lymphoma patients, obtained as part of several clinical trials (NCT01976585, NCT03789097, NCT03305445, NCT03153202). Participants in this study were 53% female and 47% male. The age range was 35-79 years old.

### Recruitment

Patients were not specifically recruited for this study

### Ethics oversight

Protocols for the treatment of patients, and human sample collection and analysis, were approved by the Mount Sinai Institutional Review Board, and written informed consent was obtained from all patients in accordance with the Declaration of Helsinki. All experiments including human specimens were performed in compliance with the relevant ethical regulations.

Note that full information on the approval of the study protocol must also be provided in the manuscript.

## Field-specific reporting

Please select the one below that is the best fit for your research. If you are not sure, read the appropriate sections before making your selection.

Life sciences  Behavioural & social sciences  Ecological, evolutionary & environmental sciences

For a reference copy of the document with all sections, see [nature.com/documents/nr-reporting-summary-flat.pdf](https://www.nature.com/documents/nr-reporting-summary-flat.pdf)

## Life sciences study design

All studies must disclose on these points even when the disclosure is negative.

### Sample size

Sample size was based on our previous experience with similar experiments and publications, in particular "Hammerich et al 2019, Nat Med, 2019 May;25(5):814-824":

"All experiments were designed for two-cohort comparison, those experiments with more than two cohorts all consider the comparison of the (multiple) experimental cohorts to the control cohort as defined for each experiment. Our primary endpoint for each study is the proportion of mice that appear to be cured of disease (therapeutic experiments) or in which disease (tumor growth) is prevented (prophylactic experiments). In our experience with these and related tumor immunotherapy models, we consider the baseline 'cure rate' to be 0% as these tumors are generally progressive and we consider an explicitly beneficial cure rate to be 50%. For these assumptions 10 mice per group are the smallest number of animals that will allow for a statistically significant result, i.e. for 0/10 versus 5/10, two-tailed P value equals 0.0325, whereas for 0/8 versus 4/8 two-tailed P value equals 0.0769 (not significant). "

Therefore, we aimed for groups of at least 10 mice for all initial in vivo experiments in order to reach statistical significance. For subsequent experiments where the cure rate for the combined treatment was already known to exceed 50%, a minimum of 8 mice per group were used.

### Data exclusions

No data were excluded from analysis

### Replication

Results were consistently replicated across experiments as indicated in figure legends.

|               |                                                                                                                                                                                                                                                   |
|---------------|---------------------------------------------------------------------------------------------------------------------------------------------------------------------------------------------------------------------------------------------------|
| Randomization | Mice and human samples were randomly allocated between groups.                                                                                                                                                                                    |
| Blinding      | Blinding was not possible, since all groups were treated differently and injected repeatedly, and the same individual was responsible for preparing materials for injection and completing all experimental procedures throughout the experiment. |

## Reporting for specific materials, systems and methods

We require information from authors about some types of materials, experimental systems and methods used in many studies. Here, indicate whether each material, system or method listed is relevant to your study. If you are not sure if a list item applies to your research, read the appropriate section before selecting a response.

### Materials & experimental systems

| n/a                                 | Involved in the study                                           |
|-------------------------------------|-----------------------------------------------------------------|
| <input type="checkbox"/>            | <input checked="" type="checkbox"/> Antibodies                  |
| <input type="checkbox"/>            | <input checked="" type="checkbox"/> Eukaryotic cell lines       |
| <input checked="" type="checkbox"/> | <input type="checkbox"/> Palaeontology and archaeology          |
| <input type="checkbox"/>            | <input checked="" type="checkbox"/> Animals and other organisms |
| <input checked="" type="checkbox"/> | <input type="checkbox"/> Clinical data                          |
| <input checked="" type="checkbox"/> | <input type="checkbox"/> Dual use research of concern           |

### Methods

| n/a                                 | Involved in the study                              |
|-------------------------------------|----------------------------------------------------|
| <input checked="" type="checkbox"/> | <input type="checkbox"/> ChIP-seq                  |
| <input type="checkbox"/>            | <input checked="" type="checkbox"/> Flow cytometry |
| <input checked="" type="checkbox"/> | <input type="checkbox"/> MRI-based neuroimaging    |

## Antibodies

### Antibodies used

Flow cytometry Abs:

Marker // Fluorophore // Clone // Company // Species // Cat#  
 CD11c // FITC // B-ly6 // BD Biosciences // anti-human // 561355  
 CD123 // Brilliant Violet 650 // 6H6 // Biolegend // anti-human // 306019  
 CD14 // Brilliant Violet 570 // M5E2 // Biolegend // anti-human // 301832  
 CD14 // FITC // M5E2 // Biolegend // anti-human // 982502  
 CD141 // Brilliant Violet 605 // M80 // Biolegend // anti-human // 344117  
 CD16 // Alexa Fluor 700 // 3G8 // Biolegend // anti-human // 302026  
 CD19 // APC // HIB-19 // Biolegend // anti-human // 302212  
 CD19 // Pacific Blue // HIB-19 // Biolegend // anti-human // 302232  
 CD19 // PE-Cy7 // HIB-19 // Biolegend // anti-human // 302216  
 CD19 // PerCP-Cy5.5 // HIB-19 // Biolegend // anti-human // 302230  
 CD1c // PerCP-eFluor 710 // L161 // eBioScience // anti-human // 46001542  
 CD20 // PE // 2H7 // BD Biosciences // anti-human // 556633  
 CD25 // Brilliant Violet 785 // M-A251 // Biolegend // anti-human // 356140  
 CD3 // PE-Cy5 // UCHT1 // Biolegend // anti-human // 300410  
 CD3 // PE-Cy7 // UCHT1 // Biolegend // anti-human // 300420  
 CD3 // PerCP-Cy5.5 // UCHT1 // Biolegend // anti-human // 300430  
 CD4 // Alexa Fluor 700 // RPA-T4 // Biolegend // anti-human // 300526  
 CD40 // APC // 5C3 // BD Biosciences // anti-human // 555591  
 CD40 // Brilliant Violet 711 // 5C3 // Biolegend // anti-human // 334334  
 CD56 // PerCP-Cy5.5 // 5.1H11 // Biolegend // anti-human // 362506  
 CD8 // Brilliant Violet 650 // RPA-T8 // Biolegend // anti-human // 301042  
 CD80 // Brilliant Violet 421 // 2D10 // Biolegend // anti-human // 305222  
 CD83 // Alexa Fluor 647 // HB15e // Biolegend // anti-human // 305316  
 CD86 // Brilliant Violet 711 // IT2.2 // Biolegend // anti-human // 305440  
 CD86 // PE-Dazzle594 // IT2.2 // Biolegend // anti-human // 305434  
 HLA-ABC // Brilliant Violet 510 // W6/32 // Biolegend // anti-human // 311436  
 HLA-DR // Alexa Fluor 700 // L243 // Biolegend // anti-human // 307626  
 HLA-DR // PE-Cy7 // L243 // Biolegend // anti-human // 307616  
 IFN- $\gamma$  // PE // 4S.B3 // Biolegend // anti-human // 502509  
 PD1 // Brilliant Violet 711 // EH12.2H7 // Biolegend // anti-human // 329928  
 PDL1 // PE // 29E.2A3 // Biolegend // anti-human // 329706  
 TNF // Alexa Fluor 647 // MAb11 // Biolegend // anti-human // 502916  
 Axl // APC // MAXL8DS // eBioScience // anti-mouse // 17108482  
 CD103 // PE // 2e7 // Biolegend // anti-mouse // 121406  
 CD11c // Alexa Fluor 700 // N418 // Biolegend // anti-mouse // 117319  
 CD11c // PE-Cy7 // N418 // Biolegend // anti-mouse // 117317  
 CD11c // PE // HL3 // BD Biosciences // anti-mouse // 557401  
 CD11c // Alexa Fluor 532 // N418 // eBioScience // anti-mouse // 58011480  
 CD11c // FITC // HL3 // BD Biosciences // anti-mouse // 553801  
 CD127 // APC-eFluor780 // A7R34 // eBioScience // anti-mouse // 47127182  
 CD132 // PE // TUGm2 // Biolegend // anti-mouse // 132306  
 CD16.2 // Pacific Blue // 9E9 // Biolegend // anti-mouse // 149528  
 CD169 // PE-Dazzle594 // 3D6.112 // Biolegend // anti-mouse // 142424

CD197/CCR7 // PE-Cy5 // 4B12 // Biolegend // anti-mouse // 120114  
 CD25 // Brilliant Violet 785 // PC61 // Biolegend // anti-mouse // 102051  
 CD25 // Brilliant Violet 650 // PC61 // Biolegend // anti-mouse // 102037  
 CD25 // PE // PC61 // Biolegend // anti-mouse // 102008  
 CD25 // PerCP-eFluor 710 // PC61.5 // eBioScience // anti-mouse // 46025182  
 CD25 // Alexa Fluor 700 // PC61 // Biolegend // anti-mouse // 102024  
 CD3 // PerCP-Cy5.5 // 145-2C11 // Biolegend // anti-mouse // 100328  
 CD3 // PE-Cy7 // 145-2C11 // Biolegend // anti-mouse // 100320  
 CD3 // Brilliant Violet 421 // 145-2C11 // Biolegend // anti-mouse // 100336  
 CD317 // Brilliant Violet 605 // 927 // Biolegend // anti-mouse // 127025  
 CD4 // Alexa Fluor 700 // RM4-5 // Biolegend // anti-mouse // 100536  
 CD4 // Brilliant Violet 650 // RM4-5 // Biolegend // anti-mouse // 100546  
 CD4 // Brilliant Violet 785 // RM4-5 // Biolegend // anti-mouse // 100552  
 CD4 // FITC // RM4-5 // Biolegend // anti-mouse // 100510  
 CD4 // PE // RM4-5 // Biolegend // anti-mouse // 100512  
 CD4 // PE-Dazzle594 // GK1.5 // Biolegend // anti-mouse // 100455  
 CD40 // PE-Cy5 // 3/23 // Biolegend // anti-mouse // 124617  
 CD40 // PE-Cy7 // 3/23 // Biolegend // anti-mouse // 124622  
 CD40 // APC // 3/23 // Biolegend // anti-mouse // 124612  
 CD44 // Alexa Fluor 647 // IM7 // Biolegend // anti-mouse // 103018  
 CD44 // PE-Cy5 // IM7 // Biolegend // anti-mouse // 103010  
 CD45 // Brilliant Violet 750 // 30-F11 // Biolegend // anti-mouse // 103157  
 CD45.1 // Alexa Fluor 700 // A20 // Biolegend // anti-mouse // 110724  
 CD45.1 // Brilliant Violet 421 // A20 // Biolegend // anti-mouse // 110732  
 CD49b // Alexa Fluor 647 // DX5 // Biolegend // anti-mouse // 108912  
 CD49b // PerCP-Cy5.5 // DX5 // Biolegend // anti-mouse // 108915  
 CD49b // Brilliant Violet 421 // DX5 // BD Biosciences // anti-mouse // 563063  
 CD62L // Brilliant Violet 570 // MEL-14 // Biolegend // anti-mouse // 104433  
 CD69 // APC // H1.2F3 // Biolegend // anti-mouse // 104514  
 CD69 // Alexa Fluor 700 // H1.2F3 // Biolegend // anti-mouse // 104539  
 CD69 // Brilliant Violet 510 // H1.2F3 // Biolegend // anti-mouse // 104531  
 CD8 // Alexa Fluor 700 // 53-6.7 // Biolegend // anti-mouse // 100730  
 CD8 // Brilliant Violet 480 // 53-6.7 // BD Biosciences // anti-mouse // 566096  
 CD8 // Brilliant Violet 711 // 53-6.7 // Biolegend // anti-mouse // 100748  
 CD8 // PerCP-Cy5.5 // 53-6.7 // Biolegend // anti-mouse // 100734  
 CD8 // Pacific Orange // 5H10 // ThermoFisher // anti-mouse // MCD0830  
 CD8 // BV510 // 53-6.7 // Biolegend // anti-mouse // 100751  
 CD80 // Brilliant Violet 421 // 16-10A1 // Biolegend // anti-mouse // 104726  
 CD80 // V450 // 16-10A1 // BD Biosciences // anti-mouse // 560523  
 CD80 // PE-Cy7 // 16-10A1 // Biolegend // anti-mouse // 104734  
 CD86 // Alexa Fluor 700 // GL-1 // Biolegend // anti-mouse // 105024  
 CD86 // Brilliant Violet 650 // GL-1 // Biolegend // anti-mouse // 105036  
 CD86 // Brilliant Violet 421 // PO3 // BD Biosciences // anti-mouse // 740034  
 Clec9A // Brilliant Violet 711 // 10B4 // BD Biosciences // anti-mouse // 744513  
 CTLA-4 // PE-Dazzle594 // UC10-4B9 // Biolegend // anti-mouse // 106318  
 CXCR3 // Brilliant Violet 650 // CXCR3-173 // Biolegend // anti-mouse // 126531  
 F4/80 // Brilliant Violet 421 // BM8 // Biolegend // anti-mouse // 123137  
 F4/80 // Brilliant Violet 711 // T45-2342 // BD Biosciences // anti-mouse // 565612  
 F4/80 // Brilliant Violet 510 // BM8 // Biolegend // anti-mouse // 123135  
 Foxp3 // Alexa Fluor 647 // MF-14 // Biolegend // anti-mouse // 126408  
 Galectin-9 // PerCP-eFluor 710 // RG9-35 // eBioScience // anti-mouse // 46-9211-82  
 Granzyme B // Alexa Fluor 647 // GB11 // Biolegend // anti-mouse // 515406  
 H2Kd // PerCP-Cy5.5 // SF1-1.1 // Biolegend // anti-mouse // 116618  
 I-Ad // Alexa Fluor 647 // 39-10-8 // Biolegend // anti-mouse // 115010  
 I-Ad // FITC // 39-10-8 // Biolegend // anti-mouse // 115006  
 IFN- $\gamma$  // PE-Cy7 // XMG1.2 // Biolegend // anti-mouse // 505826  
 IFN- $\gamma$  // PE // XMG1.2 // Biolegend // anti-mouse // 505808  
 KLRG1 // Brilliant Violet 711 // 2F1 // Biolegend // anti-mouse // 138427  
 Ki67 // PerCP-eFluor710 // SolA15 // eBioScience // anti-mouse // 46569882  
 Lag3 (CD223) // PE // C9B7W // Biolegend // anti-mouse // 125208  
 Ly6A/E Sca-1 // Alexa Fluor 700 // D7 // Biolegend // anti-mouse // 108142  
 Ly6C // Alexa Fluor 700 // HK1.4 // Biolegend // anti-mouse // 128024  
 Ly6C // Brilliant Violet 785 // HK1.4 // Biolegend // anti-mouse // 128041  
 Ly6c // BV421 // HK1.4 // Biolegend // anti-mouse // 128032  
 Ly6C // PerCP-Cy5.5 // HK1.4 // Biolegend // anti-mouse // 128012  
 Ly6G // Brilliant Violet 510 // 1A8 // Biolegend // anti-mouse // 127633  
 Ly6G // Brilliant Violet 570 // 1A8 // Biolegend // anti-mouse // 127629  
 MHC-Ib Qa-2 // Alexa Fluor 647 // 695H1-9-9 // Biolegend // anti-mouse // 121708  
 OX40 // Brilliant Violet 421 // OX86 // Biolegend // anti-mouse // 119411  
 PD1 // Brilliant Violet 421 // 29F.1A12 // Biolegend // anti-mouse // 135217  
 PD1 // Brilliant Violet 605 // 29F.1A12 // Biolegend // anti-mouse // 135219  
 PDL1 // Brilliant Violet 711 // MIH5 // BD Biosciences // anti-mouse // 563369  
 PDL1 // PE // MIH7 // Biolegend // anti-mouse // 155404  
 TCR- $\beta$  // Alexa Fluor 700 // H57-597 // Biolegend // anti-mouse // 109224  
 TCR- $\beta$  // Brilliant Violet 421 // H57-597 // Biolegend // anti-mouse // 109230  
 TCR- $\beta$  // Brilliant Violet 570 // H57-597 // Biolegend // anti-mouse // 109231

TCR- $\beta$  // PE-Cy7 // H57-597 // Biolegend // anti-mouse // 109222  
 Tim3 // PE-Dazzle594 // B8.2C12 // Biolegend // anti-mouse // 134014  
 TNF // APC // MP6-XT22 // Biolegend // anti-mouse // 506308  
 TNF // Brilliant Violet 711 // MP6-XT22 // Biolegend // anti-mouse // 506349  
 XCR1 // Brilliant Violet 650 // ZET // Biolegend // anti-mouse // 148220  
 B220 // Brilliant Violet 750 // RA3-6B2 // Biolegend // anti-mouse/anti-human // 103261  
 B220 // Brilliant Violet 421 // RA3-6B2 // Biolegend // anti-mouse/anti-human // 103239  
 B220 // PerCP-Cy5.5 // RA3-6B2 // Biolegend // anti-mouse/anti-human // 103236  
 B220 // Brilliant Violet 711 // RA3-6B2 // Biolegend // anti-mouse/anti-human // 103255  
 B220 // BUV496 // RA3-6B2 // BD Biosciences // anti-mouse/anti-human // 612950  
 CD11b // APC-Cy7 // M1/70 // Biolegend // anti-mouse/anti-human // 101225  
 CD11b // APC // M1/70 // Biolegend // anti-mouse/anti-human // 101211  
 CD11b // PE // M1/70 // Biolegend // anti-mouse/anti-human // 101208  
 Tbet // Brilliant Violet 785 // 4B10 // Biolegend // anti-mouse/anti-human // 644835  
 Tbet // PE // 4B10 // Biolegend // anti-mouse/anti-human // 644810  
 donkey anti-rabbit IgG // Alexa Fluor 647 // Poly4064 // Biolegend // anti-rabbit // 406414

All mouse and human surface antibodies were used at a dilution of 1:400 and 1:200, respectively, and for intracellular staining, mouse and human antibodies were used at a 1:200 or 1:100 dilution, respectively.

#### Microscopy Abs:

Anti-GFP-AlexaFluor 488 (clone FM264G), anti-CD8-AlexaFluor 647 (clone 53-6.7), anti-CD11c-AlexaFluor 594 (clone N418), anti-CD45.1-BV421 (clone A20), from Biolegend, or rabbit anti-cleaved caspase-3 (Asp175) (5A1E, Cell Signaling). All antibodies were used at a 1:200 dilution, except anti-cleaved caspase-3 that was used at a 1:500 dilution.

#### In vivo Abs:

Anti-mouse IFNAR (clone MAR1-5A3; BioXCell), anti-CD8 (2.43; BioXCell), anti-CD4 (GK1.5; BioXCell).

#### Validation

All anti-mouse, anti-human, and secondary anti-rabbit antibodies were validated by the manufacturers. Validation statements can be found in the manufacturers' websites (catalogue numbers are provided in Supplementary Table 2)

## Eukaryotic cell lines

Policy information about [cell lines and Sex and Gender in Research](#)

|                                                                      |                                                                                                                                                                                                                                                                                                                                                                                                                                                                            |
|----------------------------------------------------------------------|----------------------------------------------------------------------------------------------------------------------------------------------------------------------------------------------------------------------------------------------------------------------------------------------------------------------------------------------------------------------------------------------------------------------------------------------------------------------------|
| Cell line source(s)                                                  | A20 lymphoma cells were purchased from ATCC (ATCC TIB-208); A20-GFP, A20-mCherry and A20-mCherry-Luciferase were generated in-house using lentiviral transduction; A20-GFP-b2m <sup>-/-</sup> cells were generated in-house using the Crispr/Cas9 system, and SUDHL4 cells (originally purchased from DSMZ, ACC 495) were a gift from Dr. David Dominguez-Sola (Mount Sinai). Vero cells (African green monkey kidney epithelial cells) were purchased from ATCC (CCL-81). |
| Authentication                                                       | None of the cell lines used were authenticated                                                                                                                                                                                                                                                                                                                                                                                                                             |
| Mycoplasma contamination                                             | All cell lines tested negative for mycoplasma                                                                                                                                                                                                                                                                                                                                                                                                                              |
| Commonly misidentified lines<br>(See <a href="#">ICLAC</a> register) | Not used                                                                                                                                                                                                                                                                                                                                                                                                                                                                   |

## Animals and other research organisms

Policy information about [studies involving animals; ARRIVE guidelines](#) recommended for reporting animal research, and [Sex and Gender in Research](#)

|                         |                                                                                                                                                                         |
|-------------------------|-------------------------------------------------------------------------------------------------------------------------------------------------------------------------|
| Laboratory animals      | Mice: Balb/c wt, Balb/c-Batf3 <sup>-/-</sup> , Balb/c-JEDI, male and female, all 8-12 weeks                                                                             |
| Wild animals            | The study did not involve wild animals                                                                                                                                  |
| Reporting on sex        | We have used both males and females for in vivo and in vitro murine A20 lymphoma experiments. We have previously used both males and females achieving similar results. |
| Field-collected samples | The study did not involve samples collected from the field                                                                                                              |
| Ethics oversight        | All experiments were reviewed and approved by the Institutional Animal Care and Use Committee of the Icahn School of Medicine at Mount Sinai.                           |

Note that full information on the approval of the study protocol must also be provided in the manuscript.

## Plots

Confirm that:

- The axis labels state the marker and fluorochrome used (e.g. CD4-FITC).
- The axis scales are clearly visible. Include numbers along axes only for bottom left plot of group (a 'group' is an analysis of identical markers).
- All plots are contour plots with outliers or pseudocolor plots.
- A numerical value for number of cells or percentage (with statistics) is provided.

## Methodology

Sample preparation

Tumors, spleens and lymph nodes were homogenized by forcing the tissue through a 70µm nylon mesh. Cell suspensions were pelleted at 500xg for 5 minutes at 4°C and red blood cells were lysed with Pharm Lyse lysing buffer (BD). Tumor cell suspensions were then depleted of tumor cells by magnetic separation using CD19-nanobeads according to the manufacturer's protocol (Mojosort, Biolegend). Cells were stored at 4 °C until further usage.

Instrument

LSR Fortessa (BD), Attune (ThermoFisher Scientific) or Aurora (Cytek).  
Cell sorting was performed on a FACSAria (BD Biosciences).

Software

FACS Diva 6 (BD) and Attune NxT Software (ThermoFisher) for conventional flow cytometry  
SpectroFlo Software (Cytek) for spectral flow cytometry.  
Cytobank for data analysis

Cell population abundance

Purity of post-sort samples was typically 95% or higher as determined by flow cytometry

Gating strategy

Cells were first gated based on FSC/SCC, doublets were excluded using FSC-A vs FSC-W (plus SSC-A vs SSC-H for FACS-sorting), cells were then gated on live cells using a viability dye, followed by cell type-specific gating using fluorescently labeled antibodies. Example gating strategies are shown in Supplemental Fig 9.

- Tick this box to confirm that a figure exemplifying the gating strategy is provided in the Supplementary Information.
